1 Type I and Type III IFN Restrict SARS-CoV-2 Infection of Human Airway Epithelial

2 Cultures

3

4 Abigail Vanderheiden<sup>a,b,c</sup>, Philipp Ralfs<sup>b,c,d</sup>, Tatiana Chirkova<sup>a,b</sup>, Amit A. Upadhyay<sup>b,c,e</sup>,  
5 Matthew G. Zimmerman<sup>a,b,c</sup>, Shamika Bedoya<sup>d</sup>, Hadj Aoued<sup>b</sup>, Gregory M. Tharp<sup>b</sup>,  
6 Kathryn L. Pellegrini<sup>b</sup>, Anice C. Lowen<sup>d</sup>, Vineet D. Menachery<sup>f</sup>, Larry J. Anderson<sup>a,b</sup>,  
7 Arash Grakoui<sup>a,b,d</sup>, Steven E. Bosinger<sup>b,c,e</sup>, Mehul S. Suthar<sup>a,b,c,#</sup>

8

9 <sup>a</sup>Center for Childhood Infections and Vaccines (CCIV); Children's Healthcare of Atlanta;  
10 Department of Pediatrics, Emory University School of Medicine, Atlanta, GA 30322  
11 USA.

12 <sup>b</sup>Emory Vaccine Center, Emory University School of Medicine, Atlanta, GA 30329, USA.

13 <sup>c</sup>Yerkes National Primate Research Center, Atlanta, GA 30329, USA.

14 <sup>d</sup>Department of Microbiology and Immunology, Emory University School of Medicine,  
15 Atlanta, GA 30322, USA.

16 <sup>e</sup>Department of Pathology and Laboratory Medicine, Emory University School of  
17 Medicine, Atlanta, GA 30322, USA.

18 <sup>f</sup>Department of Microbiology and Immunology, Institute for Human Infection and  
19 Immunity, World Reference Center for Emerging Viruses and Arboviruses, University of  
20 Texas Medical Branch, Galveston, TX, USA.

21 #Correspondence: Mehul S. Suthar (mehul.s.suthar@emory.edu)

22 Lead contact: Mehul S. Suthar (mehul.s.suthar@emory.edu)

23 Running head: Type I and III IFN restrict SARS-CoV-2 in HAE cells

24 **ABSTRACT**

25 The newly emerged human coronavirus, SARS-CoV-2, has caused a pandemic of  
26 respiratory illness. The innate immune response is critical for protection against  
27 Coronaviruses. However, little is known about the interplay between the innate immune  
28 system and SARS-CoV-2. Here, we modeled SARS-CoV-2 infection using primary  
29 human airway epithelial (pHAE) cultures, which are maintained in an air-liquid interface.  
30 We found that SARS-CoV-2 infects and replicates in pHAE cultures and is directionally  
31 released on the apical, but not basolateral surface. Transcriptional profiling studies  
32 found that infected pHAE cultures had a molecular signature dominated by pro-  
33 inflammatory cytokines and chemokine induction, including IL-6, TNF $\alpha$ , CXCL8. We  
34 also identified NF- $\kappa$ B and ATF4 transcription factors as key drivers of this pro-  
35 inflammatory cytokine response. Surprisingly, we observed a complete lack of a type I  
36 or III IFN induction during SARS-CoV-2 infection. Pre-treatment or post-treatment with  
37 type I and III IFNs dramatically reduced virus replication in pHAE cultures and this  
38 corresponded with an upregulation of antiviral effector genes. Our findings demonstrate  
39 that SARS-CoV-2 induces a strong pro-inflammatory cytokine response yet blocks the  
40 production of type I and III IFNs. Further, SARS-CoV-2 is sensitive to the effects of type  
41 I and III IFNs, demonstrating their potential utility as therapeutic options to treat COVID-  
42 19 patients.

43

#### 44 **IMPORTANCE**

45 The current pandemic of respiratory illness, COVID-19, is caused by a recently  
46 emerged coronavirus named SARS-CoV-2. This virus infects airway and lung cells  
47 causing fever, dry cough, and shortness of breath. Severe cases of COVID-19 can  
48 result in lung damage, low blood oxygen levels, and even death. As there are currently  
49 no vaccines or antivirals approved for use in humans, studies of the mechanisms of  
50 SARS-CoV-2 infection are urgently needed. SARS-CoV-2 infection of primary human  
51 airway epithelial cultures induces a strong pro-inflammatory cytokine response yet  
52 blocks the production of type I and III IFNs. Further, SARS-CoV-2 is sensitive to the  
53 effects of type I and III IFNs, demonstrating their potential utility as therapeutic options  
54 to treat COVID-19 patients.

## 55 INTRODUCTION

56 In December 2019, a novel human coronavirus, SARS-CoV-2, emerged in Wuhan,  
57 China, causing an outbreak of severe respiratory disease (1, 2). In the span of several  
58 months, SARS-CoV-2 rapidly escalated to a pandemic, with over 4 million infections  
59 and 275,000 deaths worldwide (3). There are currently no vaccines or antivirals  
60 approved for use in humans that can prevent or treat the infection. SARS-CoV-2  
61 infection manifests as an upper and lower respiratory disease (named COVID-19 by the  
62 World Health Organization), characterized by fever, dry cough, and shortness of breath.  
63 SARS-CoV-2 targets lower respiratory tract cells, with one study finding 93% of their  
64 patients' bronchial lavages were qRT-PCR positive for SARS-CoV-2 (4).  
65 Correspondingly, lung abnormalities have been observed in several patients with  
66 COVID-19, and severe infection can lead to respiratory failure and lung tissue  
67 destruction (5). Severe disease has also been associated with a low level of  
68 lymphocytes in the blood and high levels of pro-inflammatory cytokines, such as IL-6  
69 and TNF- $\alpha$  (6). How the host innate immune system responds to SARS-CoV-2 infection  
70 is not well understood.

71  
72 The SARS-CoV-2 genome is 29.8 kb in length and predicted to contain 12 open reading  
73 frames. This includes 15 putative non-structural proteins, envelope and capsid genes,  
74 an RNA-dependent RNA polymerase (RDRP), and a spike protein (7, 8). SARS-CoV-2  
75 virus is closely related to the  $\beta$ -coronavirus SARS-CoV, which caused an outbreak of  
76 acute respiratory distress syndrome in China in 2003 (9).  $\beta$ -coronaviruses use the spike  
77 protein receptor-binding domain to gain entry to target cells, and recent studies have



78 found that SARS-CoV-2 and SARS-CoV utilize the same receptor, ACE-2 (10). SARS-  
79 CoV-2 entry was also found to require the expression of the cellular protease,  
80 TMPRSS2 (10). ACE-2 and TMPRSS2 are expressed in epithelial tissue from the lung  
81 and gut, with the highest expression in ciliated cells from the nasal cavity (11).  
82 Consistently, previous studies have shown that SARS infects and replicates in primary  
83 human airway epithelial (pHAE) cultures isolated from the nasal and tracheobronchial  
84 regions (12).

85  
86 Type I IFN is the first line of defense and is critical for blocking early virus replication,  
87 spread, and tropism as well as promoting the adaptive immune response. Type I IFN  
88 induces a systemic response that impacts nearly every cell in the host, while type III  
89 IFNs are restricted to anatomic barriers and select immune cells (13). This selectivity is  
90 due to the receptor expression patterns: type I IFN binds IFNAR1 and IFNAR2, which  
91 are ubiquitously expressed. In contrast, type III IFN binds IFNLR1 and IL10-R $\beta$ , which  
92 are expressed preferentially on epithelial cells (13). Despite using different receptors,  
93 Type I and III IFNs use similar downstream signaling complex (ISGF3) and induce  
94 similar gene expression profiles. Type III IFN induces lower levels of ISG (interferon-  
95 stimulated gene) expression, and at a slower rate than type I IFN (14, 15). Thus, type III  
96 IFN produces a less inflammatory, localized response compared to type I IFN. The role  
97 of type I and type III IFNs in restricting SARS-CoV-2 infection of lung epithelial cells has  
98 not been studied.

99

100 In this study, we seek to address some of these unanswered questions about the innate  
101 immune response to SARS-CoV-2. Here, we find that SARS-CoV-2 infects and  
102 replicates in pHAE cultures and is released exclusively from the apical surface. We  
103 performed transcriptional profiling and found that infection triggers a robust  
104 inflammatory cytokine response characterized by the induction of IL-6, CXCL8, TNF- $\alpha$ ,  
105 and IL-1 family cytokines. In contrast, we observed a lack of induction of type I IFN and  
106 IFN-stimulated genes despite the expression of both type I and III IFN receptors. We  
107 found that both pre- and post-treatment of pHAE cultures with type I or III IFNs reduced  
108 SARS-CoV-2 replication and this was correlated with increased expression of IFN-  
109 stimulated antiviral effector genes. Our studies demonstrate the utility of pHAE cultures  
110 to model SARS-CoV-2 infection and identify type I and III IFNs as potential therapeutics  
111 to restrict SARS-CoV-2 infection in COVID-19 patients.

## 112 RESULTS

### 113 Human bronchial airway epithelial cells are permissive to SARS-CoV-2 infection.

114 To understand the response of airway epithelial cells to SARS-CoV-2 infection, we  
115 utilized pHAE cultures isolated from the bronchial or tracheal region. These cells were  
116 cultured using an air-liquid interface model to create a polarized, pseudostratified  
117 epithelial layer. This culture system excellently re-capitulates the unique features of the  
118 human respiratory tract, including mucus production and coordinated cilia movement  
119 (16). pHAE cultures were infected on the apical side with SARS-CoV-2 at an MOI of 0.1  
120 and 0.25 (as determined on VeroE6 cells). In our study, we used a low cell culture-  
121 passaged and sequence-verified SARS-CoV-2 strain, nCoV2019/WA, which was  
122 isolated in January 2020 from nasopharyngeal and oropharyngeal swab specimens  
123 collected three days post-symptom onset (17). Using two different measurements, we  
124 demonstrate that SARS-CoV-2 infects and replicates in pHAE cultures. On the apical  
125 surface, we detected infectious SARS-CoV-2 beginning 24 hours post-infection (p.i.)  
126 and increased through 48 hours p.i. as measured by plaque assay (**Fig. 1A**). In  
127 contrast, we were unable to detect infectious SARS-CoV-2 virus on the basolateral side  
128 at any timepoint or MOI, suggesting the directional release of the virus from pHAE  
129 cultures. Next, we confirmed the presence of viral RNA in the cells by qRT-PCR with  
130 primer/probes that anneal to the SARS-CoV-2 RNA-dependent RNA polymerase  
131 (RDRP). We observed an increase in viral RNA between MOI 0.1 and 0.25 at 48 hours  
132 p.i. (**Fig. 1B**). Combined, these findings demonstrate that pHAE cultures are permissive  
133 for SARS-CoV-2 infection.

134

135 **SARS-CoV-2 infection prompts a pro-inflammatory response in pHAE cultures.**

136 We next evaluated the innate immune response to SARS-CoV-2 infection. To this end,  
137 we performed bulk mRNA-sequencing analysis on differentiated pHAE cultures infected  
138 with SARS-CoV-2 (MOI= 0.25) at 48 hours p.i. Following infection, we observed 1,039  
139 differentially expressed genes (DEG) ( $P < 0.01$ ; 1.5-fold change cut-off), with 458  
140 upregulated (**Fig. 2A** in red) and 581 downregulated (**Fig. 2A** in blue) DEGs. We  
141 detected viral transcripts spanning most of the viral genome, although there was minor  
142 variation between the three replicates (**Fig 2B**).

143

144 Next, we investigated genes associated with pro-inflammatory cytokine/chemokine  
145 production and signaling. Several genes showed increased expression in SARS-CoV-2  
146 infected cells as compared to mock-infected cells (**Fig 3A**; purple highlighted genes,  
147 **Supplementary Table 1**). We then performed Gene Set Enrichment Analysis (GSEA)  
148 using the Hallmarks data set from MSigDB. Compared to mock, SARS-CoV-2 infected  
149 cells had significant enrichment for TNF $\alpha$  signaling, with a normalized enrichment score  
150 (NES) of 1.53 and p-value  $< 0.0001$ , and IL-6-STAT3 related signaling (NES= 1.34,  $p <$   
151 0.04) (**Fig. 3B**). Correspondingly, SARS-CoV-2 infected cells had increased transcript  
152 expression of IL-6, TNF $\alpha$  and other cytokine genes, including the IL-17 family (IL17C,  
153 IL23A), and the IL-1 family (IL18, IL1B) (**Fig. 3C**). Several chemokines were also  
154 upregulated in SARS-CoV-2 infected cells, including molecules that promote monocyte  
155 migration (CCL4, CCL5) and neutrophil migration (CXCL8, CXCL6). We also analyzed  
156 genes associated with barrier immunity, which includes genes related to the production  
157 of mucus and anti-microbial/-viral peptides (AMPs) (**Fig. 3D**; highlighted in orange).

158 While these genes are expressed in mock and infected cells, we observed little to no  
159 change in gene expression and only a few genes approached threshold levels  
160 (**Supplementary Table 2**). This suggests that SARS-CoV-2 does not alter mucus and  
161 AMP production in pHAE cultures.

162

163 To determine the transcriptional regulatory network induced in SARS-CoV-2 infected  
164 cells, we performed cis-regulatory sequence analysis using iRegulon to predict  
165 regulatory nodes. iRegulon identifies enrichment of transcription factor binding motifs  
166 within a DEG list (18). Consistent with pathway enrichment for pro-inflammatory  
167 cytokines, our analysis identified NF- $\kappa$ B and ATF-4 as top predicted transcriptional  
168 regulators following SARS-CoV-2 infection (**Fig. 3E**). NF- $\kappa$ B regulates a substantial  
169 portion of the DEGs, with a network of 312 DEGs. This network includes some of the  
170 top upregulated genes, such as IL-6 and CXCL8. ATF-4 has a slightly smaller enriched  
171 network of 219 DEGs, that includes CHAC1, which is a key marker of the unfolded  
172 protein response (**Fig. 3E; Supplementary Table 3**) (19, 20). The identification of NF-  
173  $\kappa$ B as a key transcriptional node is consistent with our observations that SARS-CoV-2  
174 triggers cytokine induction. ATF-4 is associated with the promotion of a cellular stress  
175 response. Thus, we used GSEA to investigate if ATF4 corresponds to an enrichment of  
176 cellular stress pathways in SARS-CoV-2 infected cells (21). Compared to mock, SARS-  
177 CoV-2 infected pHAE cultures showed an enrichment of genes related to the unfolded  
178 protein response, such as ASNS, CHAC1, and STC2 (NES= 1.39, p-value< 0.0001)  
179 (**Fig. 3F**). CEBP plays a critical role in maintaining epithelial barriers by regulating the  
180 epithelial to mesenchymal transition (22). Accordingly, GSEA also revealed enrichment

181 of genes associated with the transition from epithelial to mesenchymal tissue (**Fig. 3F**).  
182 Overall, the transcriptional profiling of infected pHAE cultures revealed that the normal  
183 homeostatic functions are disrupted and they induce a pro-inflammatory phenotype  
184 characterized by NF- $\kappa$ B signaling, ER stress response and IL-6 production.

185

186 **SARS-CoV-2 does not induce IFN production or signaling in pHAE cultures.** Viral  
187 sensing by pathogen recognition receptors (PRRs) is a key initial step in responding to  
188 viral infections. Activation of PRR pathway triggers a signaling cascade that induces  
189 expression of type I IFN, interferon-regulatory factor (IRF)-dependent and IFN-  
190 dependent stimulated genes. First, we determined that SARS-CoV-2 induces minimal  
191 type I or III IFNs at the transcript level (**Fig. 4A**). In both mock and SARS-CoV-2  
192 infected samples, there was no detectable IFN $\alpha$  of any subtype, and low induction of  
193 IFN $\beta$ 1 and IFN $\lambda$ 1, with normalized read counts less than 10 (**Fig. 4A**). Next, we  
194 determined whether this was due to the lack of expression of molecules required for the  
195 induction of IFN transcription, such as the RIG-I-like receptor signaling pathway. We  
196 found that several genes within this pathway, including RIG-I, MDA5, TBK1, TRAF6,  
197 IRF-3, and IRF-7 are expressed at baseline but show little to no induction in response to  
198 SARS-CoV-2 (**Fig. 4B**; highlighted in green; **Supplementary Table 4**).

199

200 We observed little to no change in expression for several genes related to type I IFN  
201 signaling, including transcription factors and antiviral effector genes, such as IFIT2,  
202 IFIT3, IFITM1, OAS1 and MX1 (**Fig. 4C-D**; highlighted in pink; **Supplementary Table**  
203 **5**). We next evaluated the expression of both the type I IFN (IFNAR1 and IFNAR2) and

204 type III IFN (IFNLR1 and IL10R $\beta$ ) receptors. At the transcript level, the type I and III IFN  
205 receptors are present in pHAE cultures, but the expression of these receptors does not  
206 change with infection (**Fig. 4E**). Combined, these data demonstrate that SARS-CoV-2  
207 infection does not induce a type I or III IFN response in pHAE cultures, but these cells  
208 express the signaling components to respond to type I or III IFN signaling.

209

210 **Pre-treatment with type I and type III IFN restrict SARS-CoV-2 replication.** To  
211 determine whether SARS-CoV-2 is sensitive to type I and III IFNs, we pre-treated the  
212 basolateral side of pHAE cultures with IFN $\beta$ 1 or IFN $\lambda$ 1 (100 IU/mL) for 24 hours prior to  
213 infection. The next day, pHAE cultures were infected on the apical side with SARS-CoV-  
214 2 (**Fig. 5A**). As compared to untreated cells, we observed significantly reduced viral  
215 RNA in type I (3-fold less) and III (3-fold less) IFN treated cells by 24 hours p.i. (**Fig.**  
216 **5B**). We next evaluated infectious virus release and found that pHAE cultures pre-  
217 treated with type I or III IFNs significantly reduced (14-fold and 12-fold respectively)  
218 SARS-CoV-2 viral burden by 24 hours p.i., resulting in greater than 90% reduction in  
219 virus replication as compared to untreated SARS-CoV-2 infected cells (**Fig. 5C**).

220

221 To better understand how type I and III IFN signaling promotes restriction of SARS-  
222 CoV-2 replication, we performed qRT-PCR analysis of SARS-CoV-2 infected, treated  
223 and untreated cells. Both type I and III IFN treatment upregulated ISGs in uninfected  
224 and infected pHAE cells. This included innate immune sensors RIG-I and MDA5, and  
225 the IFIT family of antiviral effector genes (**Fig. 5D**). Changes in transcription factors  
226 were also observed with increases in IRF-7 and to a lesser extent IRF-1. Treatment with

227 type I and III IFNs upregulated ISGs regardless of infection status, but SARS-CoV-2  
228 infected samples had larger fold changes compared to mock-infected cells. In SARS-  
229 CoV-2 infected samples, treatment with type I IFN induced higher expression of certain  
230 ISGs (IFIH1, IFIT2) than type III IFN (**Fig. 5D**). These findings demonstrate that pre-  
231 treatment with type I or III IFN increases antiviral effector expression and restricts  
232 SARS-CoV-2 infection of pHAE cultures.

233

234 **Treatment of SARS-CoV-2 infected pHAE cultures with type I and III IFN reduces**  
235 **viral burden.** We next evaluated the antiviral potential of type I and III IFNs in a  
236 therapeutic model of infection. In this case, pHAE cultures were infected with SARS-  
237 CoV-2 (MOI= 0.5) and, at 24 hours p.i., we treated the basolateral side with IFN $\beta$ 1 or  
238 IFN $\lambda$ 1 (100 IU/mL). Infectious virus release was measured before and after treatment  
239 (**Fig. 6A**). Twenty-four hours after treatment (48 hours p.i.) there was no significant  
240 difference in viral burden between treatments. However, by 72 hours p.i., treatment with  
241 both type I and III IFN had reduced SARS-CoV-2 viral levels 50-fold compared to  
242 untreated samples, resulting in a 98% reduction in viral burden at 72 hours p.i. (**Fig.**  
243 **6A**). Analysis of RNA at 72 hours p.i. confirmed that both IFN $\beta$ 1 and IFN $\lambda$ 1 treatment  
244 reduced viral RNA compared to untreated cells, 12-fold and 20-fold, respectively (**Fig.**  
245 **6B**). Similarly, to our pre-treated samples (**Fig. 5**), treatment after infection with type I  
246 or III IFNs upregulated ISGs, such as RIG-I, MDA5, and IFIT family members,  
247 compared to untreated (**Fig. 6C**). Type I and III IFN increased expression of IRF  
248 transcription factors, IRF-7 and IRF-1 compared to mock. Combined, therapeutic



249 treatment with type I or III IFNs was effective at reducing viral burden, and upregulating  
250 ISGs in SARS-CoV-2 infected pHAE cultures.

251

## 252 **DISCUSSION**

253 In this study, we found that human pHAE cultures, which model the air-liquid interface of  
254 the lung, are permissive to SARS-CoV-2 infection and the virus is unilaterally released  
255 from the apical surface. Transcriptional profiling revealed that SARS-CoV-2 infected  
256 pHAE cultures trigger a pro-inflammatory response driven by ATF-4 and NF- $\kappa$ B. This  
257 analysis also suggested that the normal cellular functions of pHAE cultures were  
258 disrupted during SARS-CoV-2 infection, as evidenced by the enrichment of ER stress  
259 pathways. Despite having a baseline expression of viral sensing pathway components,  
260 pHAE cultures did not produce type I or III IFN in response to SARS-CoV-2 infection,  
261 and there was little to no induction of antiviral effector genes. However, pHAE cultures  
262 are sensitive to the effects of type I and III IFN, as pre-treatment with exogenous IFN  
263 was able to reduce SARS-CoV-2 burden significantly. Therapeutic administration of  
264 type I and III IFNs was also effective at restricting viral replication, and induced  
265 upregulation of ISGs in pHAE cultures. Thus, demonstrating that SARS-CoV-2 is  
266 susceptible to both type I and type III IFN, and identifying them as potential antiviral  
267 treatments.

268

269 The baseline expression of molecules such as RIG-I, MDA5, IRF-3 and IRF-7 in pHAE  
270 cultures suggests that these cells are capable of producing type I and III IFN. In other  
271 models of viral infection, pHAE cultures produce a robust IFN response (14, 23).  
272 Previous studies with SARS-CoV, showed that it is able to block the production of type I  
273 IFN, by inhibiting the phosphorylation and nuclear translocation of IRF-3, and interfering  
274 with STAT signaling (24-29). However, studies of both *in vitro* and *in vivo* SARS-CoV  
275 infection found that delayed production of type I IFN did occur eventually (30, 31).

276 Follow-up studies assessing whether SARS-CoV-2 uses similar mechanisms to block  
277 type I and III IFN production will be essential for understanding viral antagonism of  
278 innate immune signaling pathways during infection.

279  
280 pHAE cultures did not produce IFN in response to SARS-CoV-2 infection. Interestingly,  
281 SARS-CoV-2 was sensitive to the effects of both type I and III IFNs, resulting in reduced  
282 viral burden concomitant with an upregulation of ISGs. Lung epithelial cells are highly  
283 polarized, and often have differential localization of receptors, such as ACE-2, on the  
284 apical vs basolateral side (32). Thus, an interesting follow-up study would be to  
285 compare the differential effects of cytokine application to the apical side. While the  
286 reduction in viral load was similar between both IFNs, type I IFN was able to induce  
287 higher expression than type III IFN (~ 2-fold) of most ISGs in pre-treated pHAE cultures.  
288 However, in our post-treated samples, this difference disappeared. Studies of the  
289 differential effect of type I and III IFN in other viral infection models have shown  
290 differences in both magnitude and timing of ISG and IRF transcription factor expression.  
291 Type I IFN responses often peak early then decline sharply, while type III IFN  
292 responses take longer to initiate and are more sustained (14, 15). Detailed analysis of  
293 the transcriptional response to type I and III IFNs noted these differences are driven  
294 largely by IRF-1 (33). Correspondingly, we did see higher induction of IRF-1 in type I  
295 IFN treated pHAE cultures compared to type III, during SARS-CoV-2 infection. Thus,  
296 while type I and III IFNs have similar effects on SARS-CoV-2 replication, type III IFN  
297 might have a more localized, less inflammatory effect on the immune response.  
298 Dissecting the signaling pathways of type I and type III IFN could provide a clearer

299 understanding of the innate immune response in airway epithelial cells and inform the  
300 application of these cytokines as therapeutics.

301

302 In response to SARS-CoV-2 infection, pHAE cultures primarily produced pro-  
303 inflammatory cytokines, which will promote localized edema, fever, and the recruitment  
304 of immune cells into the lung. Many of the cytokines induced by SARS-CoV-2 infection,  
305 such as CXCL6, CXCL8 and CXCL5 are chemotactic factors that primarily recruit  
306 neutrophils (34). However, the recruitment of neutrophils may be of limited use in  
307 controlling SARS-CoV-2, as neutrophils are not particularly effective against intracellular  
308 pathogens, and have been associated with poor prognosis in other models of  
309 respiratory disease (35). Several cytokines primarily associated with a T<sub>H</sub>17 response  
310 (IL-23, IL-17) were also highly upregulated in SARS-CoV-2 infected pHAE cultures.  
311 While T<sub>H</sub>17 cells are important for barrier immunity, they are most potent against  
312 extracellular pathogens, and have the potential to cause chronic inflammation (36). IL-6,  
313 neutrophil infiltration, and T<sub>H</sub>17 immunity have all been previously implicated in the  
314 development of fibrotic tissue in the lung (37). Additionally, SARS-CoV-2 infected pHAE  
315 cultures were highly enriched in genes associated with the unfolded protein response  
316 and the epithelial to mesenchymal transition, which are both pathways directly linked to  
317 the formation of fibrotic tissue (38-40). The RNA-Seq data suggests that SARS-CoV-2  
318 may be producing a sub-optimal immune response in pHAE cultures, as evidenced by a  
319 preference for the production of cytokines whose primary function is in the defense  
320 against extracellular pathogens, and the complete lack of type I and III IFN signaling.  
321 Furthermore, this dysregulated immune response combined with an increase in ER

322 stress may be promoting the formation of fibrotic epithelial tissue during SARS-CoV-2  
323 infection. Additional studies are needed to explore the specific role these cytokines play  
324 during SARS-CoV-2 infection of the lung, and their implications in the formation of  
325 fibrotic tissue.

326

327 In this study, we characterized the innate immune response to SARS-CoV-2 infection  
328 using an *in vitro* model of the air-lung epithelial barrier. We found that pHAE cultures are  
329 permissive to SARS-CoV-2, but mount a weak innate antiviral response, that is notably  
330 lacking type I and III IFN production, signaling, and induction of ISGs. Instead, the  
331 innate immune response signature of infected pHAEs is dominated by pro-inflammatory  
332 cytokines and chemokines that will recruit neutrophils and monocytes. Most importantly,  
333 therapeutic treatment of pHAE cultures with type I and III IFNs are able to reduce  
334 SARS-CoV-2 viral burden. Overall, these data suggest that pHAE cultures mount a  
335 misdirected innate immune response to SARS-CoV-2 infection, but the early  
336 administration of type I or III IFN could potentially decrease virus replication and  
337 disease.

338

339

340 **MATERIALS AND METHODS:**

341 **Viruses and cells.** SARS-CoV-2 (2019-nCoV/USA\_WA1/2020) was isolated from the  
342 first reported case in the US (17). A plaque purified passage 4 stock was kindly  
343 provided by Dr. Natalie Thornburg (CDC, Atlanta, GA). Viral titers were determined by  
344 plaque assay on VeroE6 cells (ATCC). Vero cells were cultured in complete DMEM  
345 medium consisting of 1x DMEM (Corning Cellgro), 10% FBS, 25 mM HEPES Buffer  
346 (Corning Cellgro), 2 mM L-glutamine, 1mM sodium pyruvate, 1x Non-essential Amino  
347 Acids, and 1x antibiotics.

348

349 **Quantification of infectious virus.** For plaque assays, 10-fold dilutions of viral  
350 supernatant in serum-free DMEM (VWR, #45000-304) were overlaid on VeroE6  
351 monolayers and adsorbed for 1 hour at 37°C. After adsorption, 0.8% Oxoid Agarose in  
352 2X DMEM supplemented with 10% FBS (Atlanta Biologics) and 5% sodium bicarbonate  
353 was overlaid, and cultures were incubated for 72 hours at 37°C. Plaques were  
354 visualized using crystal violet staining (70% methanol in ddH<sub>2</sub>O). For focus-forming  
355 assays, 10-fold dilutions of viral supernatant on VeroE6 cells were incubated with a  
356 methylcellulose overlay (1.0% methylcellulose in 2X DMEM) for 24 hours at 37°C.  
357 Methylcellulose was then removed, cells were fixed with 2%-PFA and permeabilized  
358 with 0.1% BSA-Saponin in PBS. Cells were incubated with an anti-SARS-CoV-2 spike  
359 protein primary antibody conjugated to biotin (generously provided by Dr. Jens  
360 Wrammert, Emory University) for 2 hours at room temperature (RT), then with avidin-  
361 HRP conjugated secondary antibody for 1 hour at RT. Foci were visualized using True  
362 Blue HRP substrate and imaged on an ELI-SPOT reader.

363

364 **Generation of pHAE cultures.** pHAE cultures were kindly provided by Dr. C. U. Cotton  
365 (Case Western Reserve University) and cultured, as described previously (16). Briefly,  
366 after initial expansion in F media supplemented with ROCK inhibitor (Selleck Chemical  
367 LLC), bronchial lung specimens were seeded on Transwell permeable support inserts  
368 (Costar-Corning), cultured until confluent then transferred to an air/liquid interface.  
369 Cultures were differentiated for 3 weeks and maintained in DMEM/Ham's F12 media  
370 differentiation media supplemented with 2% of Ultrosor G (Pall Corp., France), until they  
371 had TEER measurements greater than 1000  $\Omega$  and were deemed ready for use.

372

373 **SARS-CoV-2 infection of pHAE cultures.** Prior to infection, the apical side of the  
374 pHAE cultures was washed 3 times with PBS. Virus was diluted to the specified MOI in  
375 PBS and allowed to adsorb for 1 hour at 37°C. After adsorption, the apical side was  
376 washed 3 times with PBS to remove excess virus, and the basolateral media was  
377 changed. To collect viral supernatant, PBS was added to the apical side and incubated  
378 for 30 minutes at 37°C. Treatment of pHAE cultures with type I or type III IFN was  
379 performed by adding 100 IU/mL of human IFN $\beta$  or human IFN $\lambda$ 1 (PBL Assay Science).

380

381 **RNA sequencing and bioinformatics.** pHAE cultures were infected at MOI= 0.25 for  
382 48 hours. RNA was harvested from mock and infected pHAE cultures (n=3) by gently  
383 scraping the Transwell insert with a plunger to dislodge the cells, which were then lysed  
384 by treatment with RNA lysis buffer for > 5 minutes. Total RNA was extracted using the

385 Zymo Quick-RNA MiniPrep kit according to the manufacturers protocol. mRNA  
386 sequencing libraries were prepared by the Yerkes Genomics Core  
387 ([http://www.yerkes.emory.edu/nhp\\_genomics\\_core/](http://www.yerkes.emory.edu/nhp_genomics_core/)). Libraries were sequenced on an  
388 Illumina NovaSeq 6000 and mapped to a merged reference of the hg38 human  
389 reference genome. Viral genes were mapped to the FDAARGOS\_983 strain of the  
390 2019-nCoV/USA-WA1/2020 SARS-CoV2 isolate (GenBank Accession: MT246667.1),  
391 using STAR v2.7.3a (41). Reads were normalized and differentially expressed genes  
392 were analyzed using DESeq2. Gene set enrichment analysis was performed using the  
393 software provide by the Broad Institute and the MSigDB database. Pathway analysis  
394 was performed using Cytoscape software. The raw data of all RNA sequencing will be  
395 deposited into the Gene Expression Omnibus (GEO) repository and the accession  
396 number will be available following acceptance of this manuscript.

397

398 **Quantitative reverse transcription-PCR (qRT-PCR).** RNA was extracted from the  
399 pHAE cultures using the method described above. Purified RNA was reverse  
400 transcribed into cDNA using the high-capacity cDNA reverse transcription kit (Thermo  
401 Fisher, 43-688-13). RNA levels were quantified using the IDT PrimeTime Gene  
402 Expression Master, and Taqman gene expression Primer/Probe sets. All qPCR was  
403 performed in 384- well plates and run on a QuantStudio5 qPCR system. To quantify  
404 viral RNA, SARS-CoV-2 RDRP specific primers (F:GTGARATGGTCATGTGTGGCGG ,  
405 R:CARATGTAAASACACTATTAGCATA) and probe (56-  
406 FAM/CAGGTGGAA/ZEN/CCTCATCAGGAGATGC/3IABkFQ) were used. The following  
407 Taqman Primer/ Probe sets were used in this analysis: Gapdh (Hs02758991\_g1), IFIT2



408 (Hs01922738\_s1), IFIT3 (Hs01922752\_s1), DDX58 (Hs01061436\_m1), IFIH1  
409 (Hs00223420\_m1), OAS1 (Hs00973637\_m1), IRF1 (Hs00971960\_m1), IRF7  
410 (Hs01014809\_g1), MX1 (Hs00895608\_m1). C<sub>T</sub> values were normalized to the reference  
411 gene GAPDH and represented as fold change over mock.

412

413 **Statistical Analysis.** Statistical analyses were performed using Graphpad Prism 8,  
414 ggplot2 R package, and GSEA software. Statistical significance was determined as  
415 P<0.05 using a student's t-test (when comparing two groups lacking paired  
416 measurements) or a one-way ANOVA test (when comparing more than two groups  
417 lacking paired measurements), All comparisons were made between treatment or  
418 infection conditions with time point matched, uninfected and untreated controls.

419

420

421 **Acknowledgments:** We would like to thank Dr. C. U. Cotton (Case Western Reserve  
422 University) for generously providing our pHAE specimens, Natalie Thornburg (CDC,  
423 Atlanta, GA) for providing our SARS-CoV-2 viral stock, and Drs. Jens Wrammert and  
424 Robert Kauffman (Emory University, Atlanta, GA) for making the cross-reactive anti-  
425 SARS spike CR3022 biotin-conjugated monoclonal antibody. We also thank the Yerkes  
426 Genomics Core (Emory University, Atlanta, GA) for help with the RNA-Seq analysis.

427

428 **Funding:** This work was funded in part by an Emory EVPHA Synergy Fund award  
429 (M.S.S), Center for Childhood Infections and Vaccines, Children's Healthcare of Atlanta,  
430 and by the National Institutes of Health ORIP/OD P51OD011132 (M.S.S), R00  
431 AG049092 (V.D.M) and World Reference Center for Emerging Viruses and Arboviruses  
432 R24 AI120942 (V.D.M). The research reported in this publication was supported in part  
433 by Emory University and the MP3 Initiative (M.S.S and A.L.). The content is solely the  
434 responsibility of the authors and does not necessarily represent the official views of  
435 Emory University or the MP3 Initiative. The Yerkes NHP Genomics Core is supported in  
436 part by NIH P51 OD011132, and an equipment grant, NIH S10 OD026799 (S.E.B.) The  
437 funders had no role in study design, data collection and analysis, decision to publish, or  
438 preparation, the manuscript.

439

440 **Author contributions:**

441 A.V., P.R., and M.S. contributed to the acquisition, analysis, and interpretation of the  
442 data, T.C. M.Z. and A.G. contributed to the acquisition and interpretation of the data,  
443 A.U., K.P., and S.E.B. contributed to the acquisition and analysis of the data, S.B., A.L.,

444 L.A., contributed to the acquisition of the data. T.C., A.L., L.A., V.D.M, G.M.T, H.A. and  
445 S.E.B. contributed to the interpretation of the data, as well as the conception and design  
446 of the work. A.V., P.R., A.G., and M.S. contributed to the acquisition, analysis, and  
447 interpretation of the data, as well as the conception and design of the work, and writing  
448 the manuscript.

449

450 **Declaration of Interest:** The authors declare no competing interests.

451

452

453           **REFERENCES**

- 454    1.    Zhou P, Yang XL, Wang XG, Hu B, Zhang L, Zhang W, Si HR, Zhu Y, Li B, Huang CL,  
455           Chen HD, Chen J, Luo Y, Guo H, Jiang RD, Liu MQ, Chen Y, Shen XR, Wang X, Zheng  
456           XS, Zhao K, Chen QJ, Deng F, Liu LL, Yan B, Zhan FX, Wang YY, Xiao GF, Shi ZL.  
457           2020. A pneumonia outbreak associated with a new coronavirus of probable bat origin.  
458           Nature 579:270-273.
- 459    2.    Zhu N, Zhang D, Wang W, Li X, Yang B, Song J, Zhao X, Huang B, Shi W, Lu R, Niu P,  
460           Zhan F, Ma X, Wang D, Xu W, Wu G, Gao GF, Tan W. 2020. A Novel Coronavirus from  
461           Patients with Pneumonia in China, 2019. 382:727-733.
- 462    3.    Organization WH. April 7, 2020 2020. COVID-19 Dashboard. Accessed April 7, 2020.
- 463    4.    Wang W, Xu Y, Gao R, Lu R, Han K, Wu G, Tan W. 2020. Detection of SARS-CoV-2 in  
464           Different Types of Clinical Specimens. JAMA doi:10.1001/jama.2020.3786 %J JAMA.
- 465    5.    Guan W-j, Ni Z-y, Hu Y, Liang W-h, Ou C-q, He J-x, Liu L, Shan H, Lei C-l, Hui DSC, Du  
466           B, Li L-j, Zeng G, Yuen K-Y, Chen R-c, Tang C-l, Wang T, Chen P-y, Xiang J, Li S-y,  
467           Wang J-l, Liang Z-j, Peng Y-x, Wei L, Liu Y, Hu Y-h, Peng P, Wang J-m, Liu J-y, Chen Z,  
468           Li G, Zheng Z-j, Qiu S-q, Luo J, Ye C-j, Zhu S-y, Zhong N-s. 2020. Clinical  
469           Characteristics of Coronavirus Disease 2019 in China. N Engl J Med 382.
- 470    6.    Chen G, Wu D, Guo W, Cao Y, Huang D, Wang H, Wang T, Zhang X, Chen H, Yu H,  
471           Zhang X, Zhang M, Wu S, Song J, Chen T, Han M, Li S, Luo X, Zhao J, Ning Q. 2020.  
472           Clinical and immunological features of severe and moderate coronavirus disease 2019.  
473           The Journal of Clinical Investigation 130.

- 474 7. Chan JF, Kok KH, Zhu Z, Chu H, To KK, Yuan S, Yuen KY. 2020. Genomic  
475 characterization of the 2019 novel human-pathogenic coronavirus isolated from a patient  
476 with atypical pneumonia after visiting Wuhan. *Emerg Microbes Infect* 9:221-236.
- 477 8. Kim JM, Chung YS, Jo HJ, Lee NJ, Kim MS, Woo SH, Park S, Kim JW, Kim HM, Han  
478 MG. 2020. Identification of Coronavirus Isolated from a Patient in Korea with COVID-19.  
479 *Osong Public Health Res Perspect* 11:3-7.
- 480 9. Tsang KW, Ho PL, Ooi GC, Yee WK, Wang T, Chan-Yeung M, Lam WK, Seto WH, Yam  
481 LY, Cheung TM, Wong PC, Lam B, Ip MS, Chan J, Yuen KY, Lai KN. 2003. A cluster of  
482 cases of severe acute respiratory syndrome in Hong Kong. *N Engl J Med* 348:1977-85.
- 483 10. Hoffmann M, Kleine-Weber H, Schroeder S, Kruger N, Herrler T, Erichsen S, Schiergens  
484 TS, Herrler G, Wu NH, Nitsche A, Muller MA, Drosten C, Pohlmann S. 2020. SARS-  
485 CoV-2 Cell Entry Depends on ACE2 and TMPRSS2 and Is Blocked by a Clinically  
486 Proven Protease Inhibitor. *Cell* 181:271-280.e8.
- 487 11. Sungnak W, Huang N, Bécavin C, Berg M, Queen R, Litvinukova M, Talavera-López C,  
488 Maatz H, Reichart D, Sampaziotis F, Worlock KB, Yoshida M, Barnes JL, Banovich NE,  
489 Barbry P, Brazma A, Collin J, Desai TJ, Duong TE, Eickelberg O, Falk C, Farzan M,  
490 Glass I, Gupta RK, Haniffa M, Horvath P, Hubner N, Hung D, Kaminski N, Krasnow M,  
491 Kropski JA, Kuhnemund M, Lako M, Lee H, Leroy S, Linnarson S, Lundeberg J, Meyer  
492 KB, Miao Z, Misharin AV, Nawijn MC, Nikolic MZ, Nosedá M, Ordovas-Montanes J,  
493 Oudit GY, Pe'er D, Powell J, Quake S, Rajagopal J, Tata PR, et al. 2020. SARS-CoV-2  
494 entry factors are highly expressed in nasal epithelial cells together with innate immune  
495 genes. *Nat Med*.

- 496 12. Sims AC, Baric RS, Yount B, Burkett SE, Collins PL, Pickles RJ. 2005. Severe acute  
497 respiratory syndrome coronavirus infection of human ciliated airway epithelia: role of  
498 ciliated cells in viral spread in the conducting airways of the lungs. *J Virol* 79:15511-24.
- 499 13. Lazear HM, Schoggins JW, Diamond MS. 2019. Shared and Distinct Functions of Type I  
500 and Type III Interferons. *Immunity* 50:907-923.
- 501 14. Crotta S, Davidson S, Mahlakoiv T, Desmet CJ, Buckwalter MR, Albert ML, Staeheli P,  
502 Wack A. 2013. Type I and type III interferons drive redundant amplification loops to  
503 induce a transcriptional signature in influenza-infected airway epithelia. *PLoS Pathog*  
504 9:e1003773.
- 505 15. Jilg N, Lin W, Hong J, Schaefer EA, Wolski D, Meixong J, Goto K, Brisac C, Chusri P,  
506 Fusco DN, Chevaliez S, Luther J, Kumthip K, Urban TJ, Peng LF, Lauer GM, Chung RT.  
507 2014. Kinetic differences in the induction of interferon stimulated genes by interferon-  
508 alpha and interleukin 28B are altered by infection with hepatitis C virus. *Hepatology*  
509 59:1250-61.
- 510 16. Chirkova T, Lin S, Oomens AGP, Gaston KA, Boyoglu-Barnum S, Meng J, Stobart CC,  
511 Cotton CU, Hartert TV, Moore ML, Ziady AG, Anderson LJ. 2015. CX3CR1 is an  
512 important surface molecule for respiratory syncytial virus infection in human airway  
513 epithelial cells. *J Gen Virol* 96:2543-2556.
- 514 17. Harcourt J, Tamin A, Lu X, Kamili S, Sakthivel SK, Murray J, Queen K, Tao Y, Paden  
515 CR, Zhang J, Li Y, Uehara A, Wang H, Goldsmith C, Bullock HA, Wang L, Whitaker B,  
516 Lynch B, Gautam R, Schindewolf C, Lokugamage KG, Scharton D, Plante JA,  
517 Mirchandani D, Widen SG, Narayanan K, Makino S, Ksiazek TG, Plante KS, Weaver  
518 SC, Lindstrom S, Tong S, Menachery VD, Thornburg NJ. 2020. Severe Acute

- 519           Respiratory Syndrome Coronavirus 2 from Patient with 2019 Novel Coronavirus  
520           Disease, United States. *Emerg Infect Dis* 26.
- 521    18.    Zimmerman MG, Bowen JR, McDonald CE, Young E, Baric RS, Pulendran B, Suthar  
522           MS. 2019. STAT5: a Target of Antagonism by Neurotropic Flaviviruses. *J Virol* 93.
- 523    19.    Bettigole SE, Glimcher LH. 2015. Endoplasmic reticulum stress in immunity. *Annu Rev*  
524           *Immunol* 33:107-38.
- 525    20.    Mungrue IN, Pagnon J, Kohannim O, Gargalovic PS, Lulis AJ. 2009. CHAC1/MGC4504  
526           is a novel proapoptotic component of the unfolded protein response, downstream of the  
527           ATF4-ATF3-CHOP cascade. *J Immunol* 182:466-76.
- 528    21.    Minakshi R, Padhan K, Rani M, Khan N, Ahmad F, Jameel S. 2009. The SARS  
529           Coronavirus 3a protein causes endoplasmic reticulum stress and induces ligand-  
530           independent downregulation of the type 1 interferon receptor. *PLoS One* 4:e8342.
- 531    22.    Lourenço AR, Roukens MG, Seinstra D, Frederiks CL, Pals CE, Vervoort SJ, Margarido  
532           AS, van Rheenen J, Coffey PJ. 2020. C/EBP $\alpha$  is crucial determinant of epithelial  
533           maintenance by preventing epithelial-to-mesenchymal transition. *Nature*  
534           *Communications* 11:785.
- 535    23.    Klinkhammer J, Schnepf D, Ye L, Schwaderlapp M, Gad HH, Hartmann R, Garcin D,  
536           Mahlakoiv T, Staeheli P. 2018. IFN-lambda prevents influenza virus spread from the  
537           upper airways to the lungs and limits virus transmission. *Elife* 7.
- 538    24.    Chen J, Subbarao K. 2007. The Immunobiology of SARS\*. *Annu Rev Immunol* 25:443-  
539           72.

- 540 25. Hu Y, Li W, Gao T, Cui Y, Jin Y, Li P, Ma Q, Liu X, Cao C. 2017. The Severe Acute  
541 Respiratory Syndrome Coronavirus Nucleocapsid Inhibits Type I Interferon Production  
542 by Interfering with TRIM25-Mediated RIG-I Ubiquitination. *J Virol* 91.
- 543 26. Jauregui AR, Savalia D, Lowry VK, Farrell CM, Wathelet MG. 2013. Identification of  
544 residues of SARS-CoV nsp1 that differentially affect inhibition of gene expression and  
545 antiviral signaling. *PLoS One* 8:e62416.
- 546 27. Spiegel M, Pichlmair A, Martínez-Sobrido L, Cros J, García-Sastre A, Haller O, Weber F.  
547 2005. Inhibition of Beta Interferon Induction by Severe Acute Respiratory Syndrome  
548 Coronavirus Suggests a Two-Step Model for Activation of Interferon Regulatory Factor  
549 3. *Journal of Virology* 79:2079.
- 550 28. Wong HH, Fung TS, Fang S, Huang M, Le MT, Liu DX. 2018. Accessory proteins 8b and  
551 8ab of severe acute respiratory syndrome coronavirus suppress the interferon signaling  
552 pathway by mediating ubiquitin-dependent rapid degradation of interferon regulatory  
553 factor 3. *Virology* 515:165-175.
- 554 29. Huang SH, Lee TY, Lin YJ, Wan L, Lai CH, Lin CW. 2017. Phage display technique  
555 identifies the interaction of severe acute respiratory syndrome coronavirus open reading  
556 frame 6 protein with nuclear pore complex interacting protein NPIP3 in modulating  
557 Type I interferon antagonism. *J Microbiol Immunol Infect* 50:277-285.
- 558 30. Menachery VD, Einfeld AJ, Schafer A, Josset L, Sims AC, Proll S, Fan S, Li C, Neumann  
559 G, Tilton SC, Chang J, Gralinski LE, Long C, Green R, Williams CM, Weiss J, Matzke  
560 MM, Webb-Robertson BJ, Schepmoes AA, Shukla AK, Metz TO, Smith RD, Waters KM,  
561 Katze MG, Kawaoka Y, Baric RS. 2014. Pathogenic influenza viruses and coronaviruses



- 562 utilize similar and contrasting approaches to control interferon-stimulated gene  
563 responses. *mBio* 5:e01174-14.
- 564 31. Channappanavar R, Fehr Anthony R, Vijay R, Mack M, Zhao J, Meyerholz David K,  
565 Perlman S. 2016. Dysregulated Type I Interferon and Inflammatory Monocyte-  
566 Macrophage Responses Cause Lethal Pneumonia in SARS-CoV-Infected Mice. *Cell*  
567 *Host & Microbe* 19:181-193.
- 568 32. Jia HP, Look DC, Shi L, Hickey M, Pewe L, Netland J, Farzan M, Wohlford-Lenane C,  
569 Perlman S, McCray PB, Jr. 2005. ACE2 receptor expression and severe acute  
570 respiratory syndrome coronavirus infection depend on differentiation of human airway  
571 epithelia. *J Virol* 79:14614-21.
- 572 33. Forero A, Ozarkar S, Li H, Lee CH, Hemann EA, Nadsombati MS, Hendricks MR, So L,  
573 Green R, Roy CN, Sarkar SN, von Moltke J, Anderson SK, Gale M, Jr., Savan R. 2019.  
574 Differential Activation of the Transcription Factor IRF1 Underlies the Distinct Immune  
575 Responses Elicited by Type I and Type III Interferons. *Immunity* 51:451-464.e6.
- 576 34. Sokol CL, Luster AD. 2015. The chemokine system in innate immunity. *Cold Spring Harb*  
577 *Perspect Biol* 7.
- 578 35. Tang BM, Shojaei M, Teoh S, Meyers A, Ho J, Ball TB, Keynan Y, Pisipati A, Kumar A,  
579 Eisen DP, Lai K, Gillett M, Santram R, Geffers R, Schreiber J, Mozhui K, Huang S,  
580 Parnell GP, Nalos M, Holubova M, Chew T, Booth D, Kumar A, McLean A, Schughart K.  
581 2019. Neutrophils-related host factors associated with severe disease and fatality in  
582 patients with influenza infection. *Nat Commun* 10:3422.
- 583 36. Weaver CT, Elson CO, Fouser LA, Kolls JK. 2013. The Th17 pathway and inflammatory  
584 diseases of the intestines, lungs, and skin. *Annu Rev Pathol* 8:477-512.

- 585 37. Le TT, Karmouty-Quintana H, Melicoff E, Le TT, Weng T, Chen NY, Pedroza M, Zhou Y,  
586 Davies J, Philip K, Molina J, Luo F, George AT, Garcia-Morales LJ, Bunge RR, Bruckner  
587 BA, Loebe M, Seethamraju H, Agarwal SK, Blackburn MR. 2014. Blockade of IL-6 Trans  
588 signaling attenuates pulmonary fibrosis. *J Immunol* 193:3755-68.
- 589 38. Kalluri R, Neilson EG. 2003. Epithelial-mesenchymal transition and its implications for  
590 fibrosis. *J Clin Invest* 112:1776-84.
- 591 39. Kim KK, Kugler MC, Wolters PJ, Robillard L, Galvez MG, Brumwell AN, Sheppard D,  
592 Chapman HA. 2006. Alveolar epithelial cell mesenchymal transition develops in vivo  
593 during pulmonary fibrosis and is regulated by the extracellular matrix. *Proc Natl Acad Sci*  
594 U S A 103:13180-5.
- 595 40. Lin L, Han Q, Xiong Y, Li T, Liu Z, Xu H, Wu Y, Wang N, Liu X. 2017. Krüppel-like-factor  
596 4 Attenuates Lung Fibrosis via Inhibiting Epithelial-mesenchymal Transition. *Sci Rep*  
597 7:15847.
- 598 41. Dobin A, Davis CA, Schlesinger F, Drenkow J, Zaleski C, Jha S, Batut P, Chaisson M,  
599 Gingeras TR. 2013. STAR: ultrafast universal RNA-seq aligner. *Bioinformatics* 29:15-21.

600

601

## 602 **FIGURE LEGENDS**

603 **Figure 1. pHAE cultures are permissive to SARS-CoV-2 infection.** A) Healthy,  
604 differentiated pHAE cultures were infected by adsorption to the apical side at the  
605 indicated MOI. The supernatant was collected from the apical or basolateral side of the  
606 epithelial layer, and the virus was measured by plaque assay. B) Viral RNA was  
607 measured by probing for the SARS-CoV-2 RDRP RNA at 48 hours p.i. by qRT-PCR.  $C_T$   
608 values are represented as relative fold change over mock ( $\log_{10}$ ). All experiments were  
609 repeated twice with biological triplicates.

610

611 **Figure 2. Bulk RNA-Seq analysis of SARS-CoV-2 infected pHAE cultures.** pHAE  
612 cultures were infected apically with SARS-CoV-2 (MOI= 0.25) for 48 hours, at which  
613 point mock and SARS-CoV-2 infected (n=3) samples were harvested for bulk RNA-Seq  
614 analysis. A) Volcano plot demonstrating DEGs. Lines indicate cut-offs; p-value <0.01,  
615 fold-change <-1.5 or >1.5. Highlighted in red are the most highly upregulated genes (p-  
616 value <0.001, fold-change >1.5), in blue are most highly downregulated genes (p-value  
617 <0.001, fold-change < -1.5). B) Normalized read counts ( $\log_2$ ) of SARS-CoV-2 RNA  
618 products, using the MT246667.1 reference sequence.

619

620 **Figure 3. SARS-CoV-2 infection promotes a pro-inflammatory and ER stress**  
621 **response in pHAE cultures.** pHAE cultures were infected apically with SARS-CoV-2  
622 (MOI= 0.25) for 48 hours, at which point mock and SARS-CoV-2 infected (n=3) samples  
623 were harvested for bulk RNA-Seq analysis. For global DEG analysis see figure 2. A)

624 Volcano plot with all DEGs in grey and the indicated gene set highlighted (purple= pro-  
625 inflammatory signaling). B) GSEA plots of the enrichment score plotted against gene  
626 rank. Individual gene hits are indicated by the solid black line below the enrichment  
627 score curve. NES and p-value are indicated on the plot. Gene sets are from the  
628 Hallmarks gene set from MSigDB. C) Heatmap illustrating z-scores for the indicated  
629 genes in mock and SARS-CoV-2 infected samples D) Volcano plot illustrating barrier  
630 immunity associated genes in orange. E) Network map illustrating regulatory nodes for  
631 our DEGs. F) GSEA plots for the indicated gene sets.

632

633 **Figure 4. pHAE cultures fail to upregulate type I or III IFNs in response to SARS-**  
634 **CoV-2 infection.** RNA-Seq analysis of the IFN response, for global DEG analysis see  
635 figure 2. A) Normalized read counts ( $\log_2$ ) in mock (white) and SARS-CoV-2 infected  
636 (grey samples) of type I and type III IFN. Volcano plots illustrating all genes in grey and  
637 B) genes associated with IFN production in green C) genes associated with IFN  
638 signaling in pink. D) Bar graphs indicating the normalized read count ( $\log_2$ ) for  
639 interferon-stimulated genes and E) type I and type III IFN receptors for mock and  
640 SARS-CoV-2 infected samples.

641

642 **Figure 5. Pre-treatment with type I or III IFNs restricts SARS-CoV-2 replication in**  
643 **pHAE cultures.** pHAE cultures were pre-treated from the basolateral side with IFN $\beta$ 1 or  
644 IFN $\lambda$ 1 (100 IU/mL) for 24 hours. Cultures were then infected apically (MOI= 0.25) and  
645 harvested at 24 hours p.i. A) Experimental schematic. B) SARS-CoV-2 viral burden in

646 untreated, IFN $\beta$ 1, and IFN $\lambda$ 1 treated cultures as assessed via focus forming assay.  
647 Percent reduction was calculated as the percent of the untreated sample at 24 hours p.i.  
648 qRT-PCR analysis was performed at 24 hours p.i. for C) viral RNA, or D) ISGs. qRT-  
649 PCR data are represented as fold change over mock, untreated pHAEC samples. Data is  
650 representative of two independent experiments performed in biological triplicate. All  
651 data were analyzed using one-way ANOVA. \* =  $p < 0.05$ , \*\* =  $p < 0.01$ , \*\*\* =  $p < 0.001$ .

652

653 **Figure 6. Post-treatment with type I or III IFNs decreases viral burden in pHAEC**  
654 **cultures.** pHAEC cultures were infected with SARS-CoV-2 (MOI = 0.5) apically. Twenty-  
655 four hours p.i., cultures were treated from the basolateral side with IFN $\beta$ 1 or IFN $\lambda$ 1 (100  
656 IU/mL). 72 hours p.i. (48 hours post-treatment), cultures were harvested for qRT-PCR  
657 analysis. A) SARS-CoV-2 burden was assessed via FFA for the apical side of  
658 untreated, IFN $\beta$ 1, and IFN $\lambda$ 1 treated cultures. Percent reduction was calculated for the  
659 72-hour timepoint. qRT-PCR analysis at 72 hours p.i. as compared to mock, untreated  
660 samples, measuring B) viral RNA, or C) ISGs. qRT-PCR data are represented as fold  
661 change over mock. Results are representative of two independent experiments  
662 performed in triplicate. Growth curves were analyzed using a two-way ANOVA, qRT-  
663 PCR data were analyzed using one-way ANOVA. \* =  $p < 0.05$ , \*\* =  $p < 0.01$ , \*\*\* =  
664  $p < 0.001$ .

665

666

667 **SUPPLEMENTAL FIGURE LEGENDS**

668 **Supplemental Table 1. Pro-inflammatory associated gene expression in pHAE**  
669 **cultures.** List of the pro-inflammatory genes surveyed in pHAE cultures. Fold-changes  
670 ( $\log_2$ ) are calculated over mock, with the corresponding p-value.

671  
672 **Supplemental Table 2. Barrier immunity associated with gene expression in pHAE**  
673 **cultures.** List of the barrier immunity associated genes surveyed in pHAE cultures.  
674 Fold-changes ( $\log_2$ ) are calculated over mock, with the corresponding p-value.

675  
676 **Supplemental Table 3. NF-kB, ATF-4 and CEBPB associated genes.** List of genes  
677 promoted by the NF-kB, ATF-4 and CEBPB transcription factors. Fold-changes ( $\log_2$ )  
678 are calculated over mock, with the corresponding p-value.

679  
680 **Supplemental Table 4. Genes associated with the induction of interferon in pHAE**  
681 **cultures.** List of the PRR signaling genes surveyed in pHAE cultures. Fold-changes  
682 ( $\log_2$ ) are calculated over mock, with the corresponding p-value.

683  
684 **Supplemental Table 5. Interferon stimulated and IFN receptor-associated genes in**  
685 **pHAE cultures.** List of the genes associated with IFN signaling and ISGs surveyed in  
686 pHAE cultures. Fold-changes ( $\log_2$ ) are calculated over mock, with the corresponding p-  
687 value.

## Figure 1

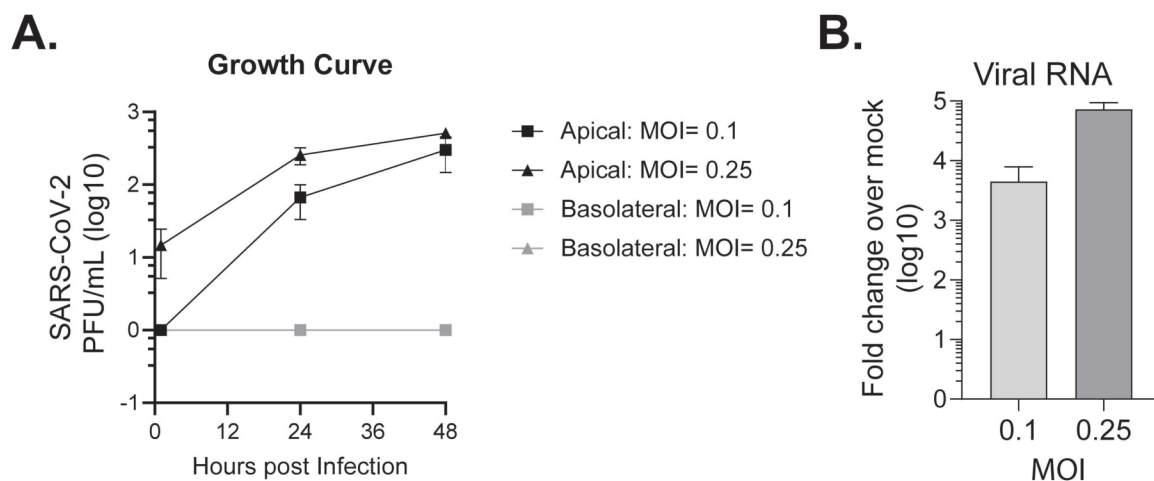

**Figure 1. pHAE cell cultures are permissive to SARS-CoV-2 infection.** A) Healthy, differentiated pHAE cell cultures were infected by adsorption to the apical side at the indicated MOI. The supernatant was collected from the apical or basolateral side of the epithelial layer, and the virus was measured by plaque assay. B) Viral RNA was measured by probing for the SARS-CoV-2 RDRP RNA at 48 hours p.i. by qRT-PCR. CT values are represented as relative fold change over mock (log10). All experiments were repeated twice with biological triplicates.

## Figure 2

A.

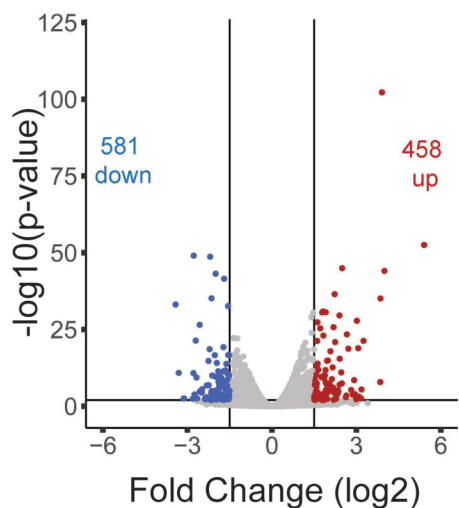

B.

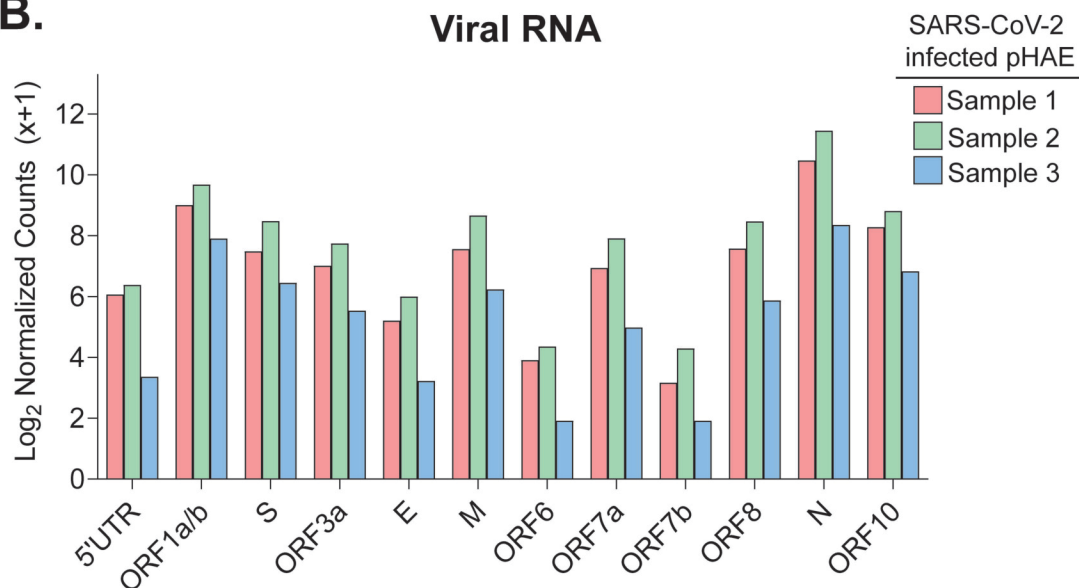

**Figure 2. Bulk RNA-Seq analysis of SARS-CoV-2 infected pHAE cell cultures.** pHAE cell cultures were infected apically with SARS-CoV-2 (MOI= 0.25) for 48 hours, at which point mock and SARS-CoV-2 infected (n=3) samples were harvested for bulk RNA-Seq analysis. A) Volcano plot demonstrating DEGs. Lines indicate cut-offs; p-value <0.01, fold-change <-1.5 or >1.5. Highlighted in red are the most highly upregulated genes (p-value <0.001, fold-change >1.5), in blue are most highly downregulated genes (p-value <0.001, fold-change < -1.5). B) Normalized read counts (log<sub>2</sub>) of SARS-CoV-2 RNA products, using the MT246667.1 reference sequence.



## Figure 3

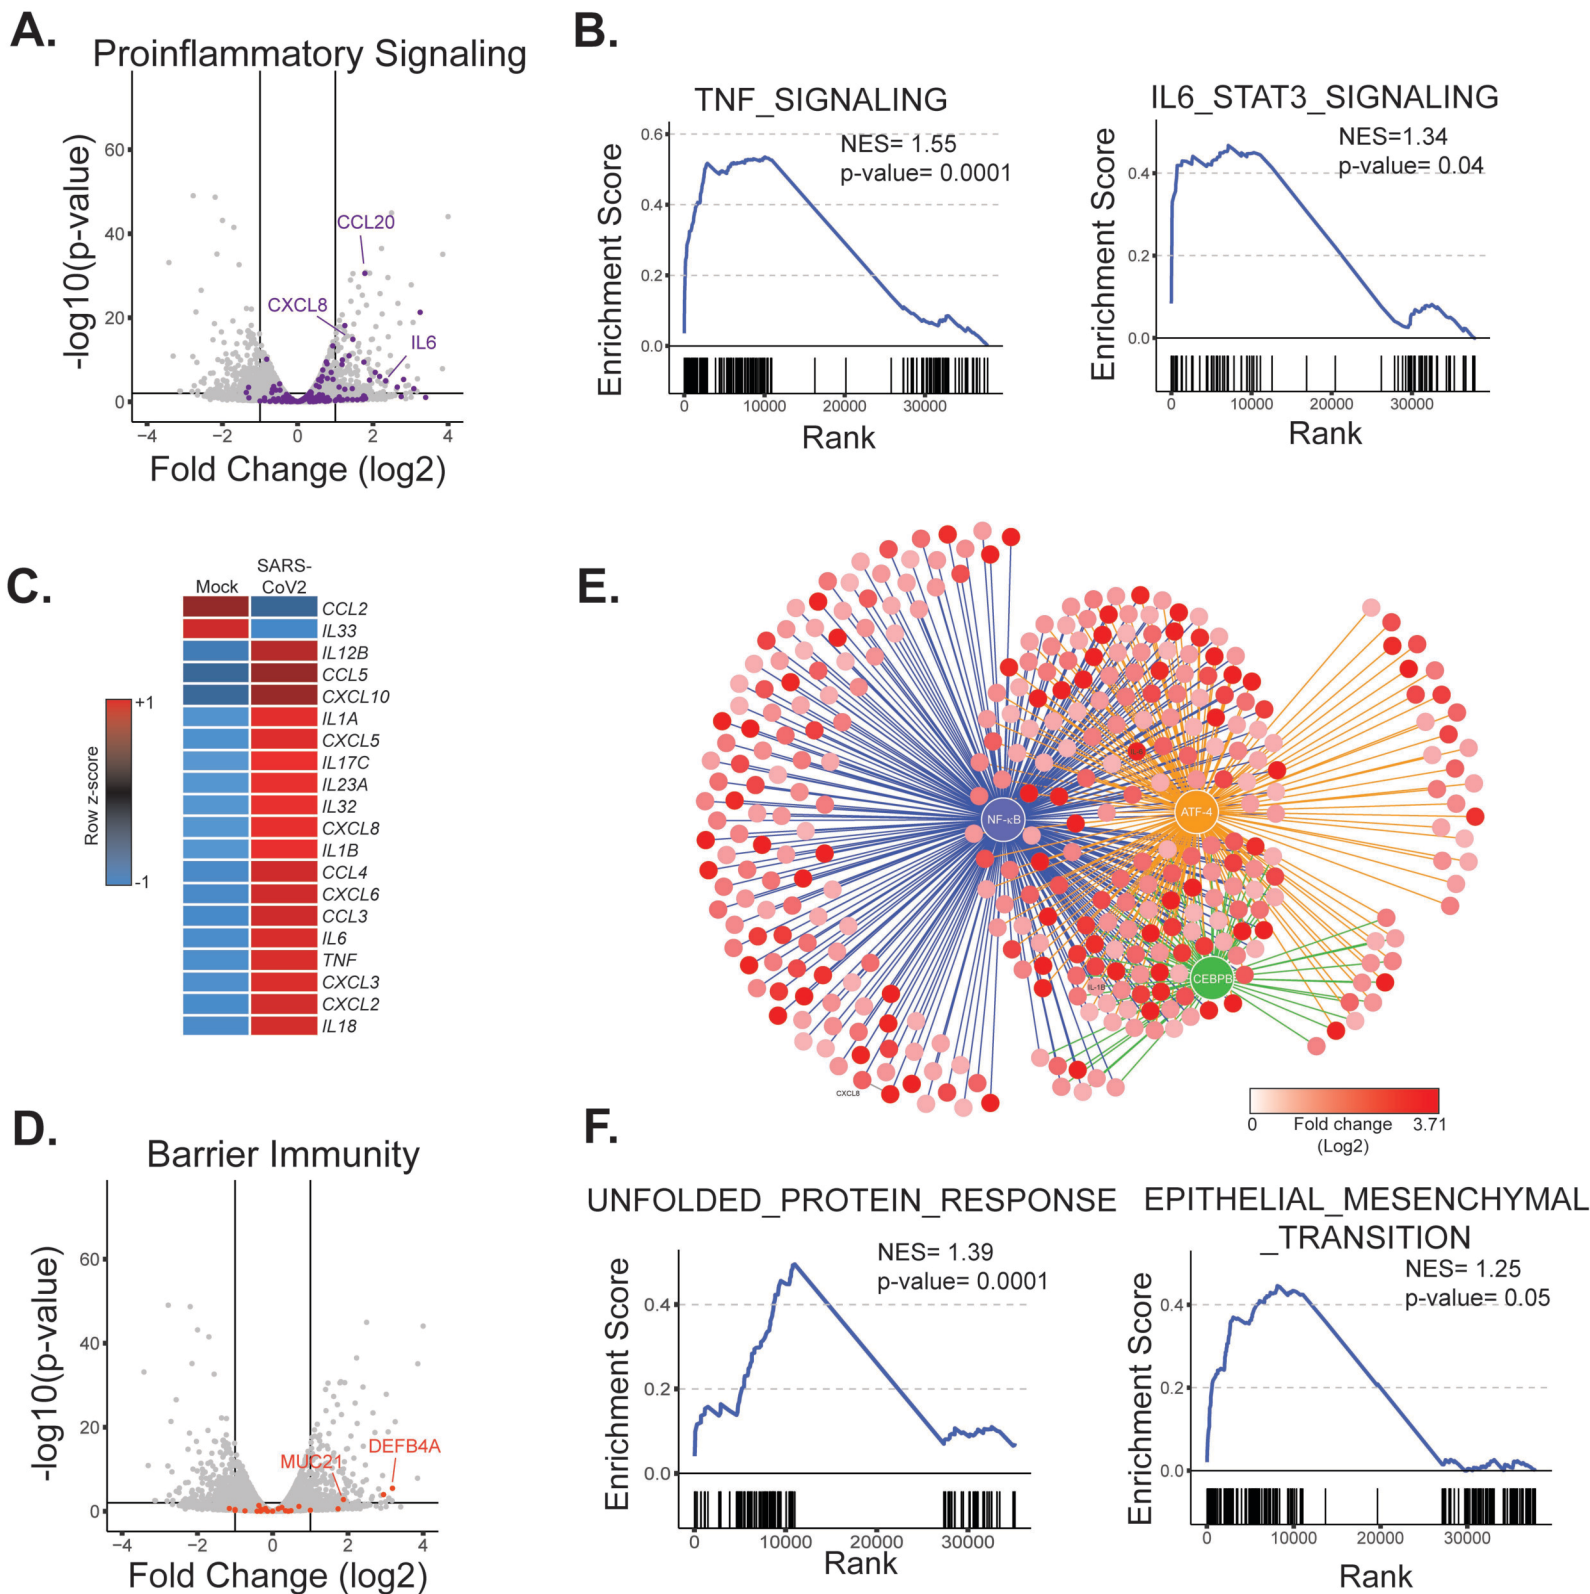

**Figure 3. SARS-CoV-2 infection promotes a pro-inflammatory and ER stress response in pHAEC cell cultures.** pHAEC cell cultures were infected apically with SARS-CoV-2 (MOI= 0.25) for 48 hours, at which point mock and SARS-CoV-2 infected (n=3) samples were harvested for bulk RNA-Seq analysis. For global DEG analysis see figure 2. A) Volcano plot with all DEGs in grey and the indicated gene set highlighted (purple= pro-inflammatory signaling). B) GSEA plots of the enrichment score plotted against gene rank. Individual gene hits are indicated by the solid black line below the enrichment score curve. NES and p-value are indicated on the plot. Gene sets are from the Hallmarks gene set from MSigDB. C) Heatmap illustrating z-scores for the indicated genes in mock and SARS-CoV-2 infected samples D) Volcano plot illustrating barrier immunity associated genes in orange. E) Network map illustrating regulatory nodes for our DEGs. F) GSEA plots for the indicated gene sets.

## Figure 4

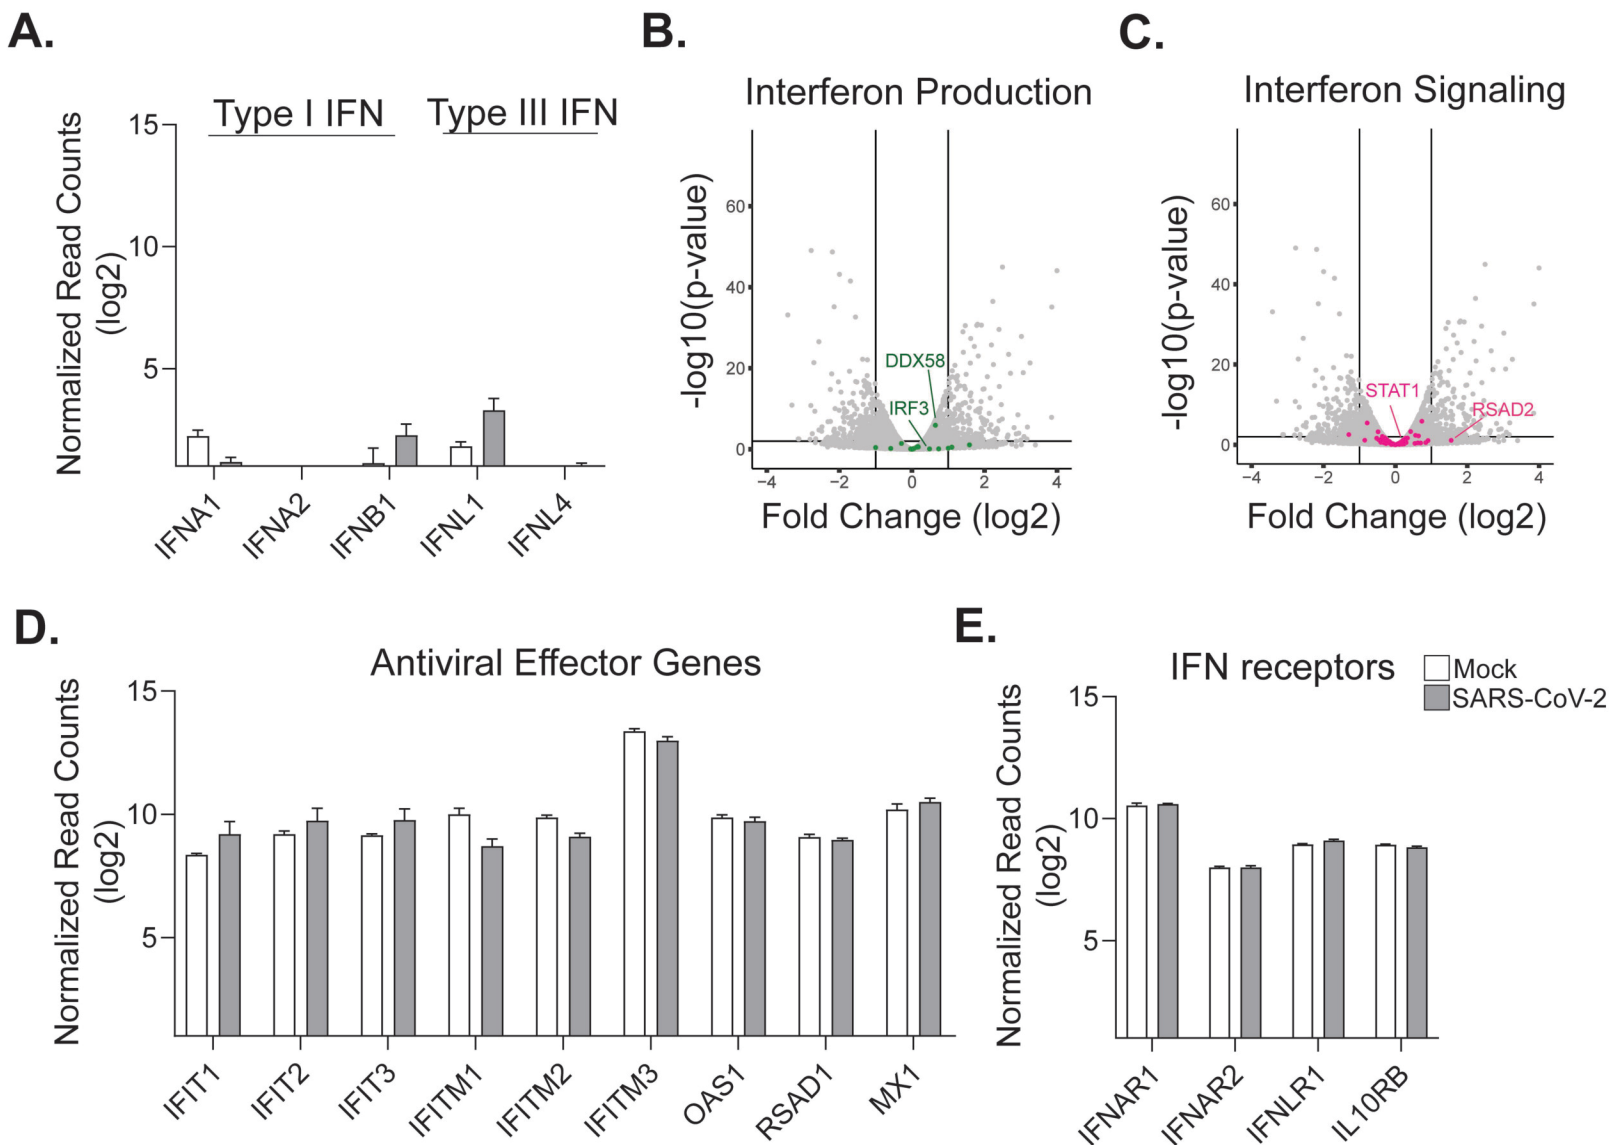

**Figure 4. pHAEC cell cultures fail to upregulate type I or III IFNs in response to SARS-CoV-2 infection.**

RNA-Seq analysis of the IFN response, for global DEG analysis see figure 2. A) Normalized read counts (log<sub>2</sub>) in mock (white) and SARS-CoV-2 infected (grey samples) of type I and type III IFN. Volcano plots illustrating all genes in grey and B) genes associated with IFN production in green C) genes associated with IFN signaling in pink. D) Bar graphs indicating the normalized read count (log<sub>2</sub>) for interferon-stimulated genes and E) type I and type III IFN receptors for mock and SARS-CoV-2 infected samples.

## Figure 5

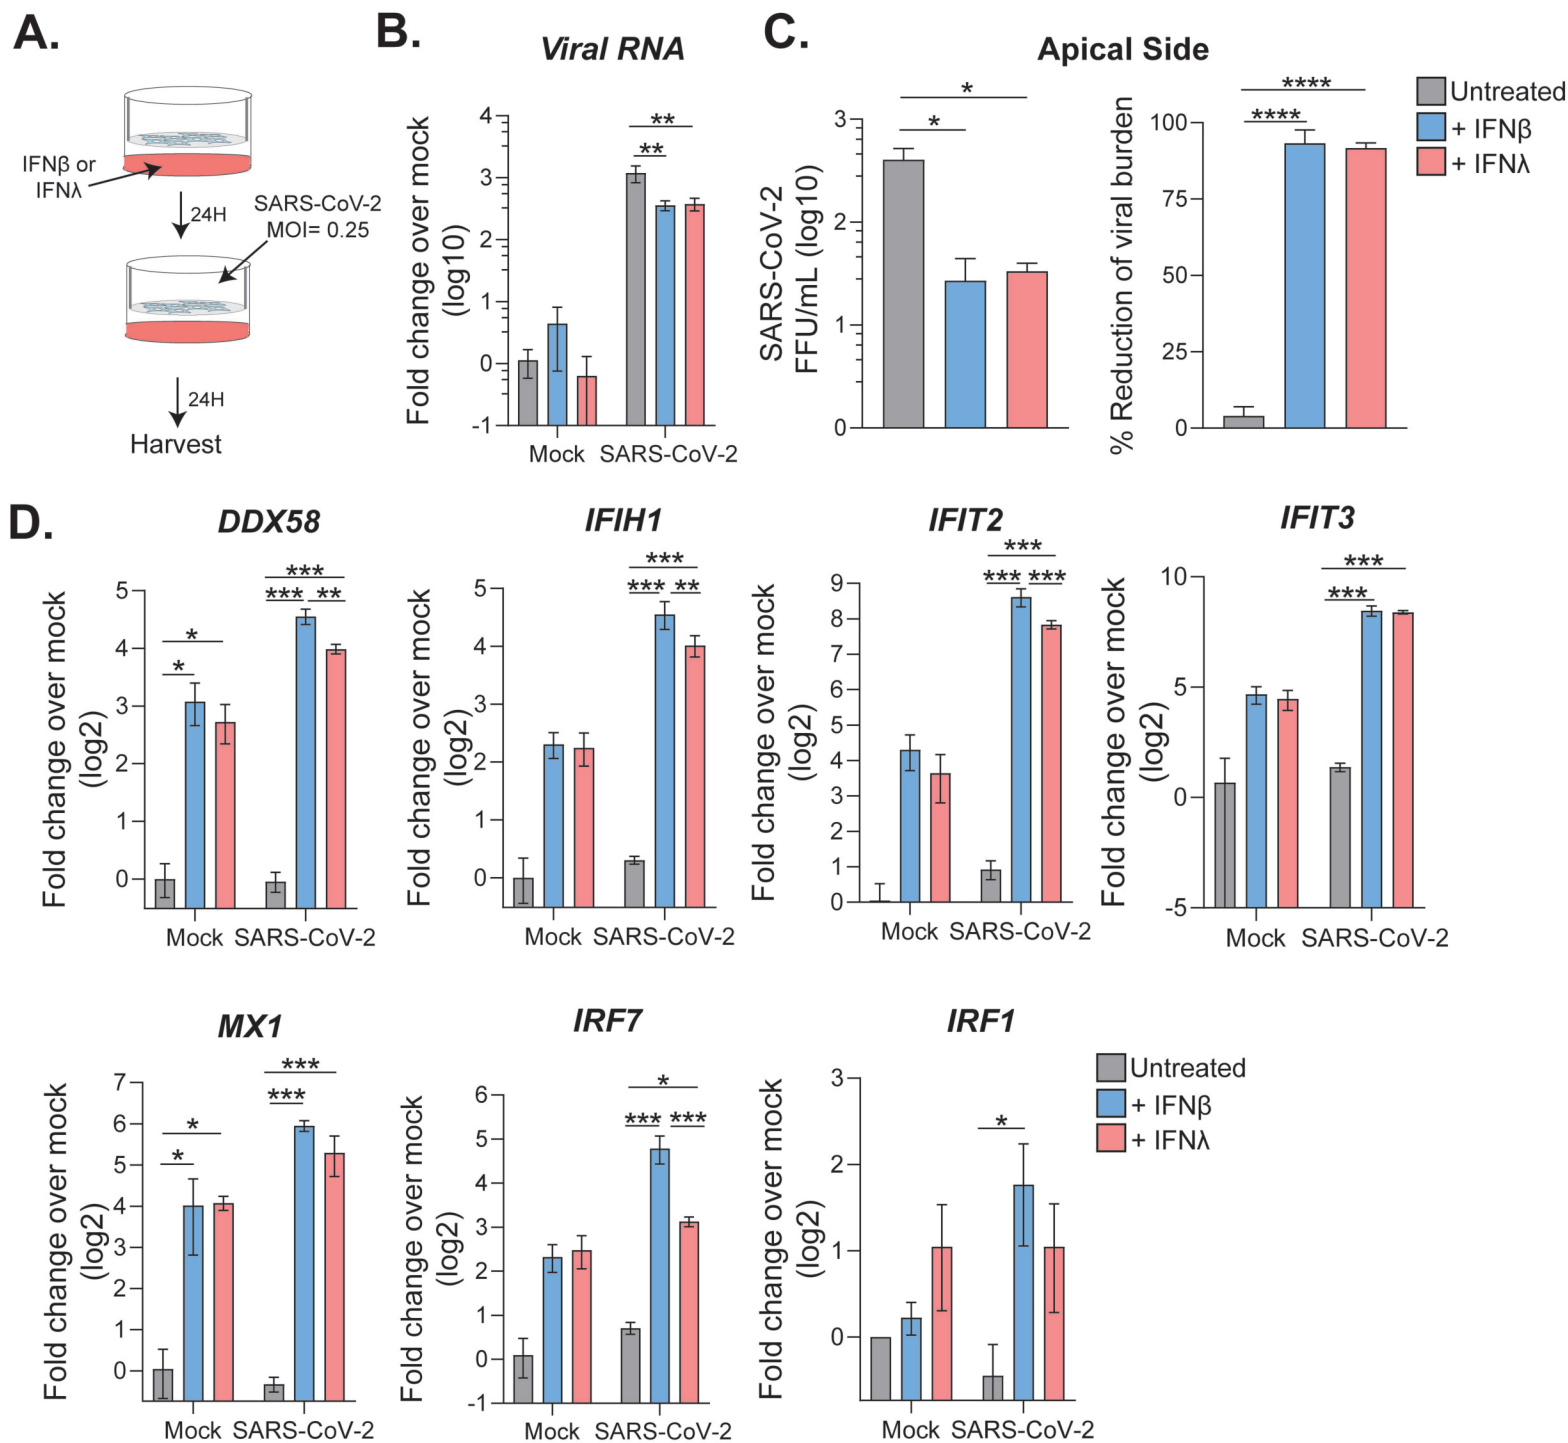

**Figure 5. Pre-treatment with type I or III IFNs restricts SARS-CoV-2 replication in pHAEC cell cultures.** pHAEC cell cultures were pre-treated from the basolateral side with IFN $\beta$ 1 or IFN $\lambda$ 1 (100 IU/mL) for 24 hours. Cultures were then infected apically (MOI= 0.25) and harvested at 24 hours p.i. A) Experimental schematic. B) SARS-CoV-2 viral burden in untreated, IFN $\beta$ 1, and IFN $\lambda$ 1 treated cultures as assessed via focus forming assay. Percent reduction was calculated as the percent of the untreated sample at 24 hours p.i. qRT-PCR analysis was performed at 24 hours p.i. for C) viral RNA, or D) ISGs. qRT-PCR data are represented as fold change over mock, untreated pHAEC samples. Data is representative of two independent experiments performed in biological triplicate. All data were analyzed using one-way ANOVA. \* =  $p < 0.05$ , \*\* =  $p < 0.01$ , \*\*\* =  $p < 0.001$ .



## Figure 6

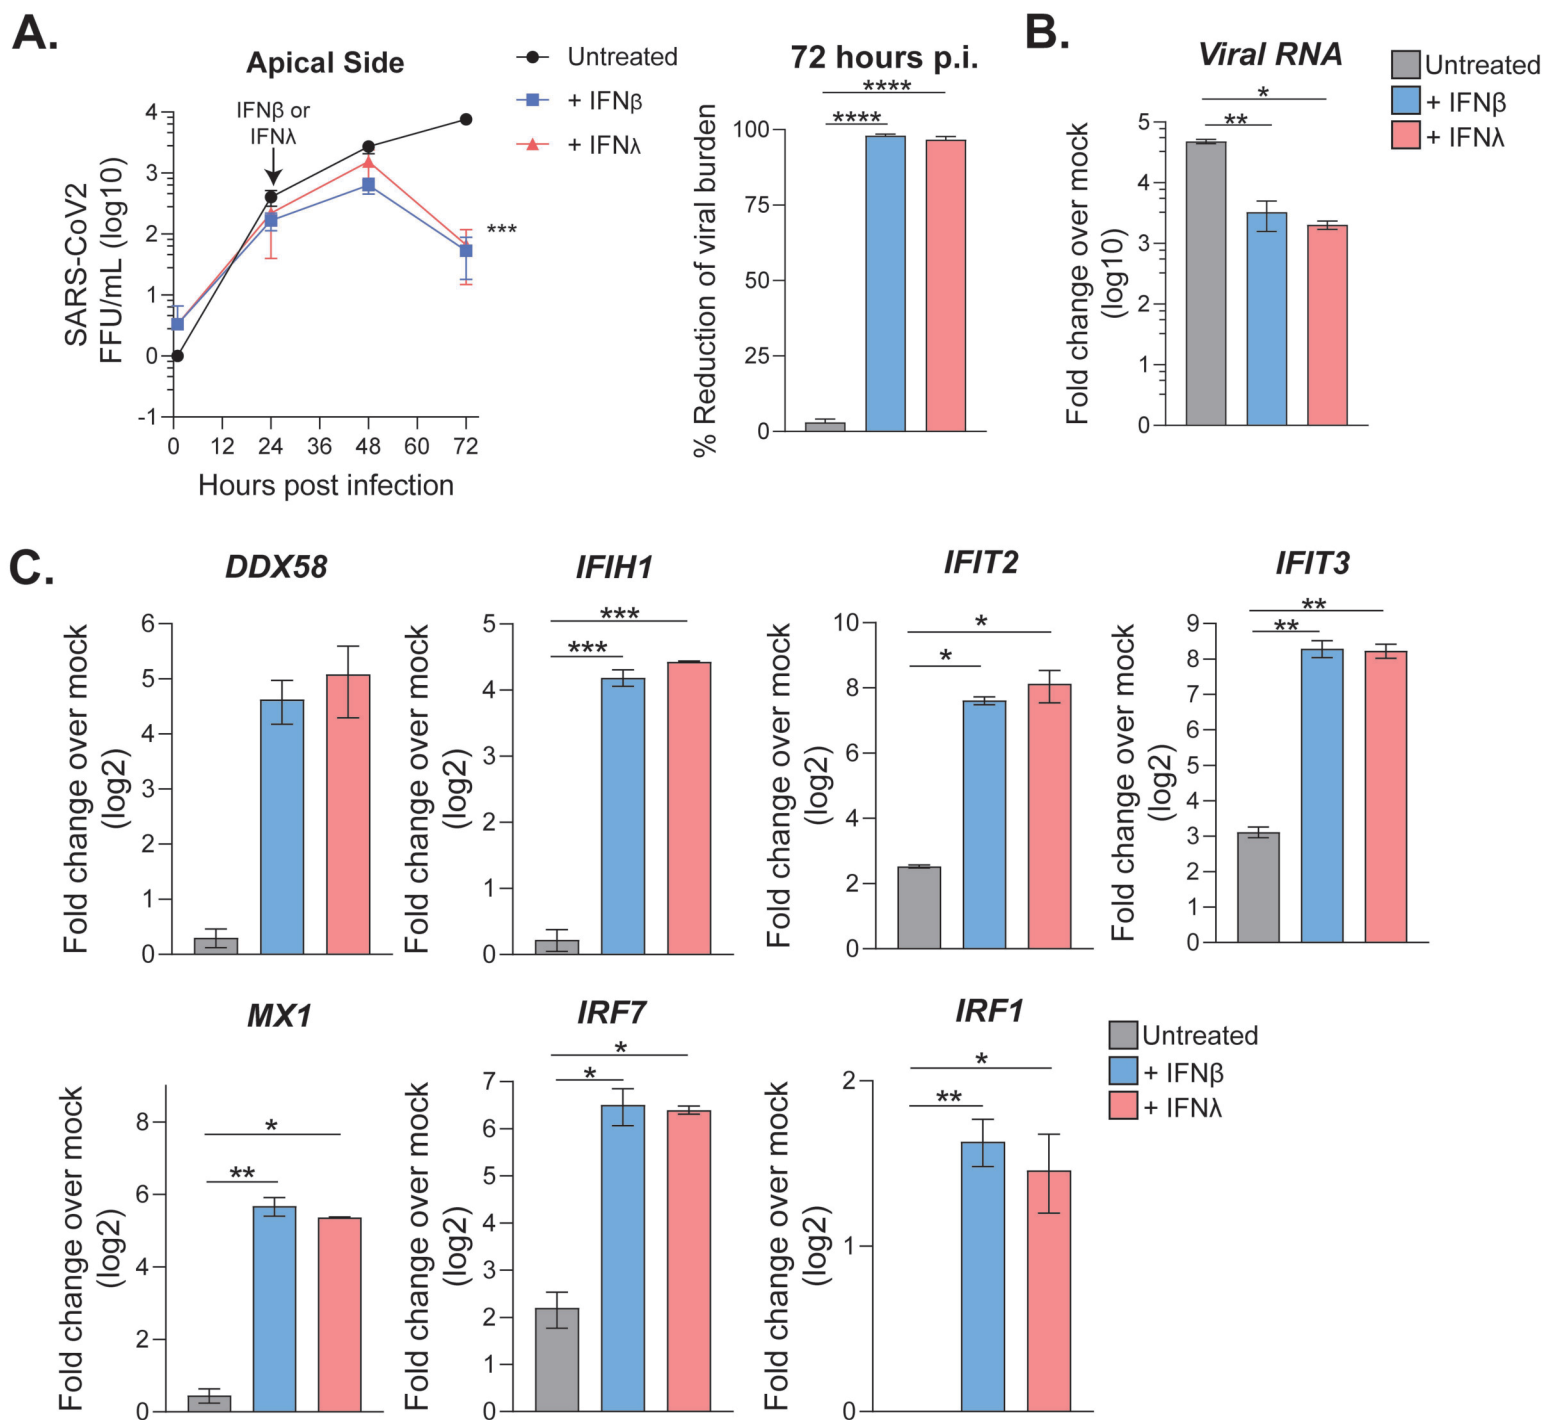

**Figure 6. Post-treatment with type I or III IFNs decreases viral burden in pHAEC cell cultures.** pHAEC cell cultures were infected with SARS-CoV-2 (MOI = 0.5) apically. Twenty-four hours p.i., cultures were treated from the basolateral side with IFN $\beta$ 1 or IFN $\lambda$ 1 (100 IU/mL). 72 hours p.i. (48 hours post-treatment), cultures were harvested for qRT-PCR analysis. A) SARS-CoV-2 burden was assessed via FFA for the apical side of untreated, IFN $\beta$ 1, and IFN $\lambda$ 1 treated cultures. Percent reduction was calculated for the 72-hour timepoint. qRT-PCR analysis at 72 hours p.i. as compared to mock, untreated samples, measuring B) viral RNA, or C) ISGs. qRT-PCR data are represented as fold change over mock. Results are representative of two independent experiments performed in triplicate. Growth curves were analyzed using a two-way ANOVA, qRT-PCR data were analyzed using one-way ANOVA. \* = p < 0.05, \*\* = p < 0.01, \*\*\* = p < 0.001.
